# Supplementary material for: Blue light and CO2 signals converge to regulate light-induced stomatal opening
Source: PubMed Central journal article supplement (PMC5670223; doi:10.1038/s41467-017-01237-5), 2017-11-03
Supplement: 41467_2017_1237_MOESM3_ESM.pdf [file 41467_2017_1237_MOESM3_ESM.pdf]

## **Description of Additional Supplementary Files**

File Name: Supplementary Data 1

Description: Phosphopeptides in guard cells in response to blue light.
